# Supplementary material for: Unoccupied Aircraft Systems (UASs) Reveal the Morphological Changes at Stromboli Volcano (Italy) before, between, and after the 3 July and 28 August 2019 Paroxysmal Eruptions
Source: MDPI journal article supplement (doi:10.3390/rs13152870), 2021-07-22
Supplement: s1 [file s1]

## SUPPLEMENTARY MATERIALS TO

### Unoccupied aircraft systems (UAS) reveal the morphological changes at Stromboli volcano (Italy) before, between, and after the 3 July and 28 August 2019 paroxysmal eruptions

Civico, R.<sup>1</sup>, Ricci, T.<sup>1</sup>, Scarlato, P.<sup>1</sup>, Andronico, D.<sup>2</sup>, Cantarero, M.<sup>2</sup>, Carr, B.B.<sup>3\*</sup>, De Beni, E.<sup>2</sup>, Del Bello, E.<sup>1</sup>, Johnson, J.B.<sup>4</sup>, Kueppers, U.<sup>5</sup>, Pizzimenti, L.<sup>1§</sup>, Schmid, M.<sup>5</sup>, Strehlow, K.<sup>6</sup>, Taddeucci, J.<sup>1</sup>

[1] Istituto Nazionale di Geofisica e Vulcanologia, Sezione di Roma 1, Italy

[2] Istituto Nazionale di Geofisica e Vulcanologia, Sezione di Catania, Osservatorio Etneo, Italy

[3] Lamont-Doherty Earth Observatory, Columbia University, New York, NY, USA

[4] Boise State University, Department of Geosciences, ID, USA

[5] Ludwig-Maximilians-Universität (LMU), Earth & Environmental Sciences, Munich, Germany

[6] GEOMAR Helmholtz Centre for Ocean Research, Kiel, Germany

\* Now at: United States Geological Survey, Hawaiian Volcano Observatory, Hilo, HI, USA

§ Now at: Soft Strategy Bit Group S.p.A., Rome, Italy

| Survey date               | 12/09/2018* | 11/05/2019 | 20/06/2019 | 04-05/08/2019 | 23/09/2019 | 26/11/2019<br>(lava field only) | 25/01/2020 | 20/06/2020 |
|---------------------------|-------------|------------|------------|---------------|------------|---------------------------------|------------|------------|
| Photo alignment accuracy  | High        | High       | High       | High          | High       | High                            | High       | High       |
| Generic preselection      | No          | Yes        | Yes        | Yes           | Yes        | Yes                             | Yes        | Yes        |
| Reference preselection    | Yes         | Source     | Source     | Yes           | Source     | Source                          | Source     | Yes        |
| Key point limit           | 0           | 40000      | 30000      | 40000         | 40000      | 40000                           | 40000      | 40000      |
| Tie point limit           | 0           | 4000       | 1000       | 4000          | 4000       | 4000                            | 4000       | 4000       |
| Dense point cloud quality | High        | High       | High       | High          | High       | High                            | High       | High       |
| Depth filtering           | Aggressive  | Aggressive | Aggressive | Aggressive    | Aggressive | Aggressive                      | Aggressive | Aggressive |

*Table S1 - processing parameters used in Agisoft Metashape®. \*Point cloud from Carr, 2019b.*

| <b>Reference model</b> | <b>Aligned model</b> | <b>Alignment rms Error (m)</b> |
|------------------------|----------------------|--------------------------------|
| 2012 LiDAR             | September 2018       | 0.39                           |
| September 2018         | May 2019             | 0.26                           |
| September 2018         | June 2019            | 0.32                           |
| September 2018         | August 2019          | 0.77                           |
| September 2018         | September 2019       | 0.63                           |
| September 2018         | November 2019        | 0.17                           |
| September 2018         | January 2020         | 0.40                           |
| September 2018         | June 2020            | 0.57                           |

*Table S2 - Model alignments and associated rms errors reported in Cloud Compare software*

| Attribute                                                                   | Raw     | Thresholded DoD Estimate:         |                 |            |
|-----------------------------------------------------------------------------|---------|-----------------------------------|-----------------|------------|
| AREAL:                                                                      |         |                                   |                 |            |
| Total Area of Surface Lowering (m <sup>2</sup> )                            | 18,488  | 17,842                            |                 |            |
| Total Area of Surface Raising (m <sup>2</sup> )                             | 28,312  | 27,605                            |                 |            |
| Total Area of Detectable Change (m <sup>2</sup> )                           | NA      | 45,447                            |                 |            |
| Total Area of Interest (m <sup>2</sup> )                                    | 46,800  | NA                                |                 |            |
| Percent of Area of Interest with Detectable Change                          | NA      | 97%                               |                 |            |
| VOLUMETRIC:                                                                 |         | ± Error<br>Volume      % Error    |                 |            |
| Total Volume of Surface Lowering (m <sup>3</sup> )                          | 143,127 | 142,967                           | ± 8,921         | 6%         |
| Total Volume of Surface Raising (m <sup>3</sup> )                           | 212,744 | 212,566                           | ± 13,803        | 6%         |
| Total Volume of Difference (m <sup>3</sup> )                                | 355,871 | 355,533                           | ± 22,724        | 6%         |
| Total <b>Net</b> Volume Difference (m <sup>3</sup> )                        | 69,617  | <b>69,600</b>                     | <b>± 16,435</b> | <b>24%</b> |
| VERTICAL AVERAGES:                                                          |         | ± Error<br>Thickness      % Error |                 |            |
| Average Depth of Surface Lowering (m)                                       | 7.74    | 8.01                              | ± 0.50          | 6%         |
| Average Depth of Surface Raising (m)                                        | 7.51    | 7.70                              | ± 0.50          | 6%         |
| Average Total Thickness of Difference (m) for Area of Interest              | 7.60    | 7.60                              | ± 0.49          | 6%         |
| Average <b>Net</b> Thickness Difference (m) for Area of Interest            | 1.49    | <b>1.49</b>                       | <b>± 0.35</b>   | <b>24%</b> |
| Average Total Thickness of Difference (m) for Area With Detectable Change   | NA      | 7.82                              | ± 0.50          | 6%         |
| Average <b>Net</b> Thickness Difference (m) for Area with Detectable Change | NA      | <b>1.53</b>                       | <b>± 0.36</b>   | <b>24%</b> |
| PERCENTAGES (BY VOLUME)                                                     |         |                                   |                 |            |
| Percent Elevation Lowering                                                  | 40%     | 40%                               |                 |            |
| Percent Surface Raising                                                     | 60%     | 60%                               |                 |            |
| Percent Imbalance (departure from equilibrium)                              | 10%     | 10%                               |                 |            |
| Net to Total Volume Ratio                                                   | 20%     | 20%                               |                 |            |

Table S3 - Change detection results for the period May 2019 - September 2019 calculated over the Crater Terrace Area Of Interest (CT-AOI)

| Attribute                                                                   | Raw     | Thresholded DoD Estimate:                         |                 |     |  |
|-----------------------------------------------------------------------------|---------|---------------------------------------------------|-----------------|-----|--|
| AREAL:                                                                      |         |                                                   |                 |     |  |
| Total Area of Surface Lowering (m²)                                         | 4.760   | 4.167                                             |                 |     |  |
| Total Area of Surface Raising (m²)                                          | 42.040  | 41.307                                            |                 |     |  |
| Total Area of Detectable Change (m²)                                        | NA      | 45.474                                            |                 |     |  |
| Total Area of Interest (m²)                                                 | 46.800  | NA                                                |                 |     |  |
| Percent of Area of Interest with Detectable Change                          | NA      | 97%                                               |                 |     |  |
| VOLUMETRIC:                                                                 |         | ± Error<br>Volume                      % Error    |                 |     |  |
| Total Volume of Surface Lowering (m³)                                       | 19.219  | 19.077                                            | ± 2.084         | 11% |  |
| Total Volume of Surface Raising (m³)                                        | 466.601 | 466.412                                           | ± 20.654        | 4%  |  |
| Total Volume of Difference (m³)                                             | 485.820 | 485.490                                           | ± 22.737        | 5%  |  |
| Total <b>Net</b> Volume Difference (m³)                                     | 447.383 | <b>447.335</b>                                    | <b>± 20.758</b> | 5%  |  |
| VERTICAL AVERAGES:                                                          |         | ± Error<br>Thickness                      % Error |                 |     |  |
| Average Depth of Surface Lowering (m)                                       | 4,04    | 4,58                                              | ± 0,50          | 11% |  |
| Average Depth of Surface Raising (m)                                        | 11,10   | 11,29                                             | ± 0,50          | 4%  |  |
| Average Total Thickness of Difference (m) for Area of Interest              | 10,38   | 10,37                                             | ± 0,49          | 5%  |  |
| Average <b>Net</b> Thickness Difference (m) for Area of Interest            | 9,56    | <b>9,56</b>                                       | <b>± 0,44</b>   | 5%  |  |
| Average Total Thickness of Difference (m) for Area With Detectable Change   | NA      | 10,68                                             | ± 0,50          | 5%  |  |
| Average <b>Net</b> Thickness Difference (m) for Area with Detectable Change | NA      | <b>9,84</b>                                       | <b>± 0,46</b>   | 5%  |  |
| PERCENTAGES (BY VOLUME)                                                     |         |                                                   |                 |     |  |
| Percent Elevation Lowering                                                  | 4%      | 4%                                                |                 |     |  |
| Percent Surface Raising                                                     | 96%     | 96%                                               |                 |     |  |
| Percent Imbalance (departure from equilibrium)                              | 46%     | 46%                                               |                 |     |  |
| Net to Total Volume Ratio                                                   | 92%     | 92%                                               |                 |     |  |

Table S4 - Change detection results for the period September 2018 - June 2020 calculated over the Crater Terrace Area Of Interest (CT-AOI)

| Check Point Id | 12/09/2018 | 11/05/2019 | 04-05/08/2019 | 23/09/2019 | 25/01/2020 | 20/06/2020 |
|----------------|------------|------------|---------------|------------|------------|------------|
| 0              | 829.24     |            |               |            | 829.61     | 829.73     |
| 1              | 767.41     | 767.34     | 767.60        | 767.84     | 767.68     | 767.75     |
| 2              | 796.84     | 796.83     | 797.80        | 797.60     | 796.91     | 796.84     |
| 3              |            |            | 737.44        |            | 737.88     | 737.87     |
| 4              |            |            |               |            | 794.18     | 793.93     |
| 5              | 684.58     |            | 684.39        | 684.41     | 684.50     | 684.25     |

*Table S5 - Elevation values (in m) extracted at 5 checkpoints placed in the unchanged regions of our DSMs.*

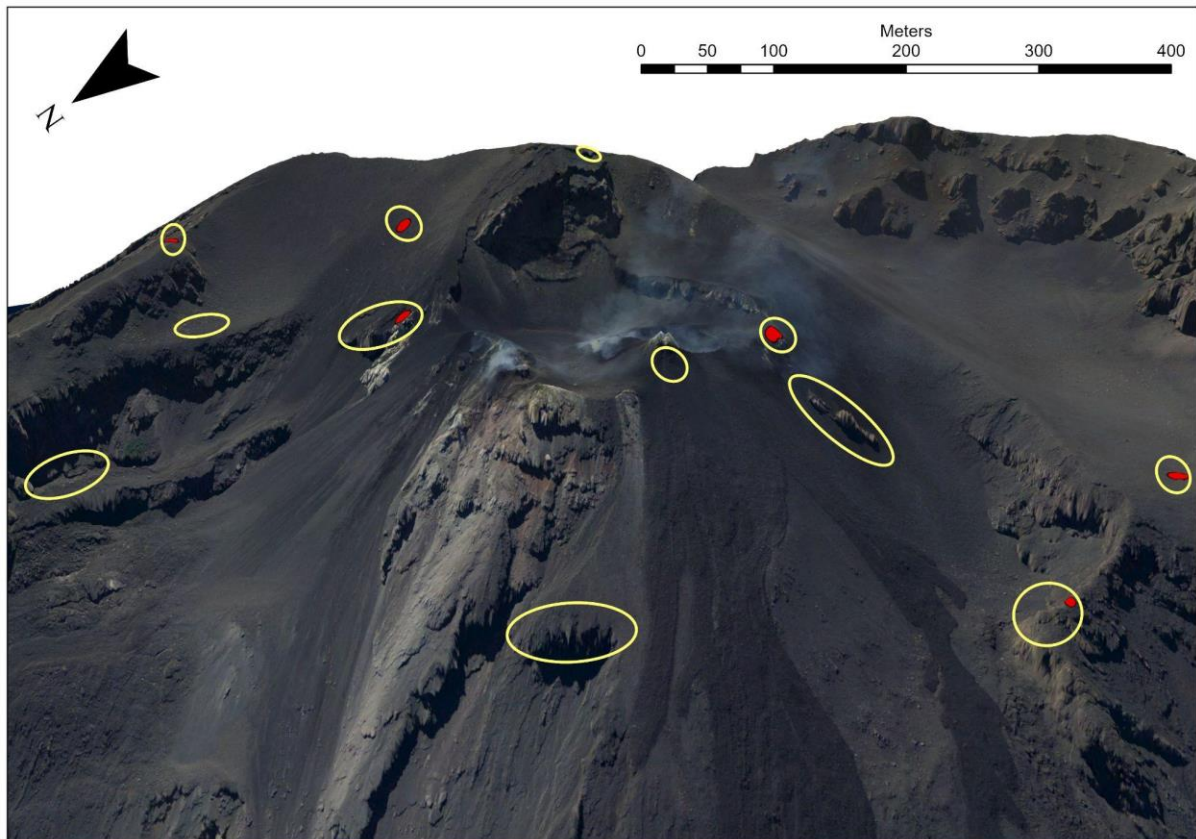

*Figure S1. Features located in unchanged areas of the volcano used for the alignment of the models (yellow ellipses). Red dots indicate the checkpoints used to compute residual elevation differences (see section 2.2).*



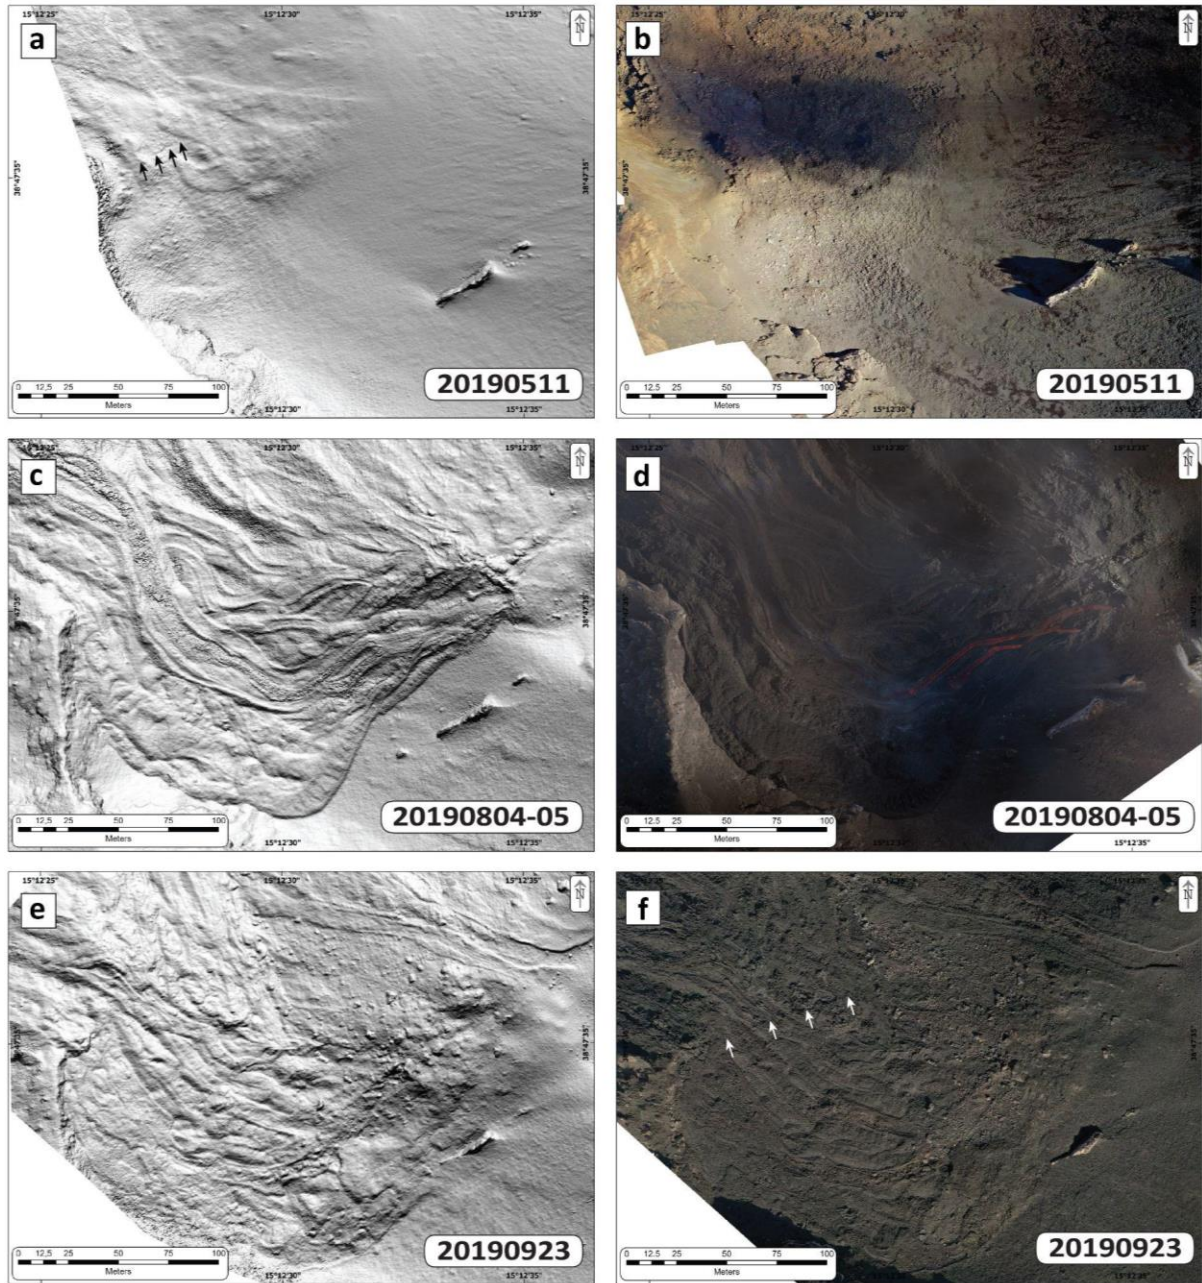

Figure S2 - DSMs and orthomosaics of the lava field area. Arrows in a) and f) indicate the surface expression of the main N30° fissure belonging to the "fratture Tibaldi" fissure swarm (see Figure 8 in the main text).



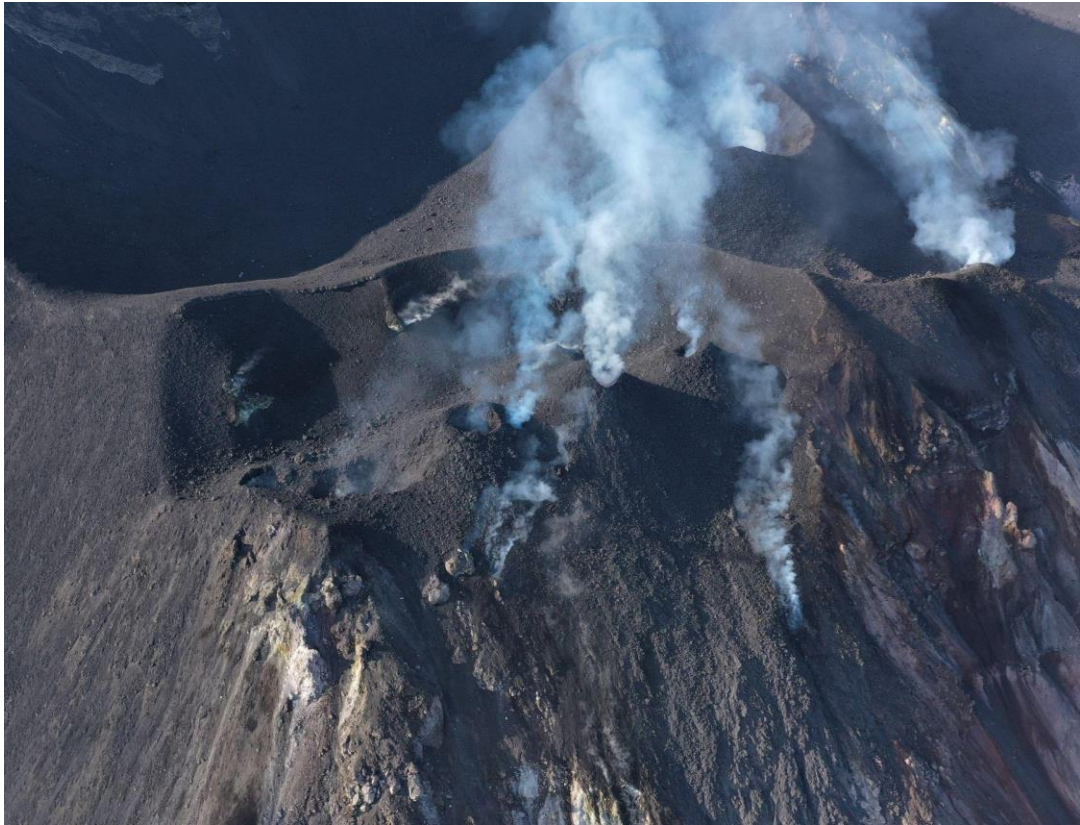

*Figure S3 - Alignment of hornitos in the N crater area (in the foreground) and plume rising from two vents located in the CS crater area (in the upper right background). Photo taken 05 August 2019.*

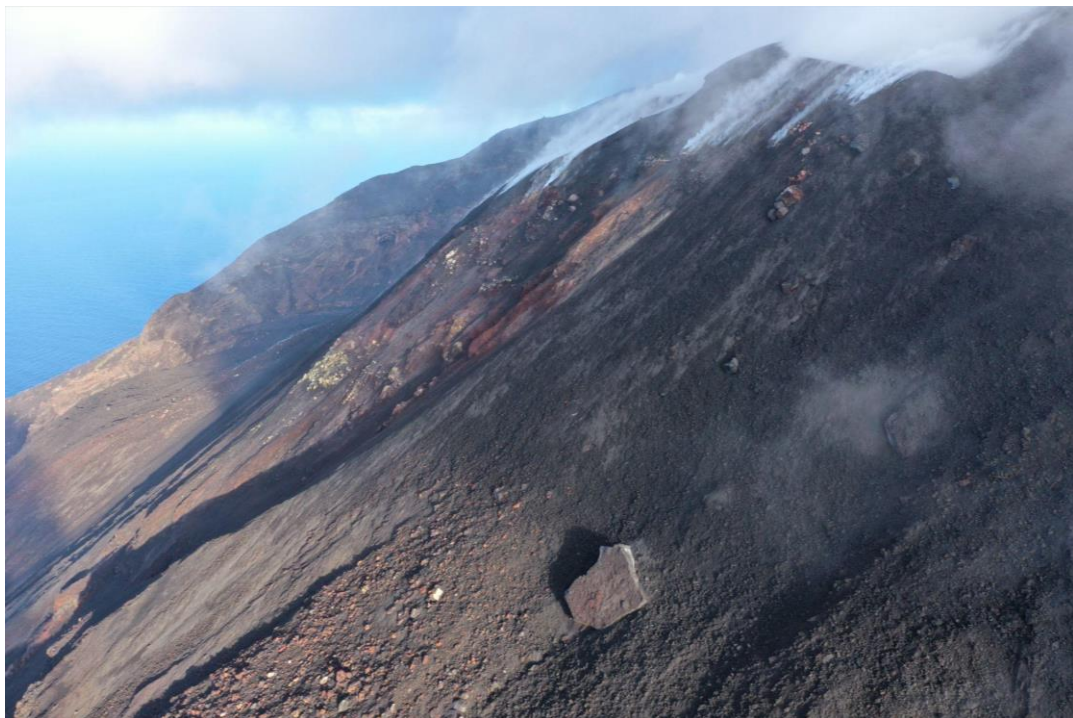

*Figure S4 - Block deposited on the SdF on 28 August 2019 (in the foreground) and the crater terrace rim (in the upper right background).*

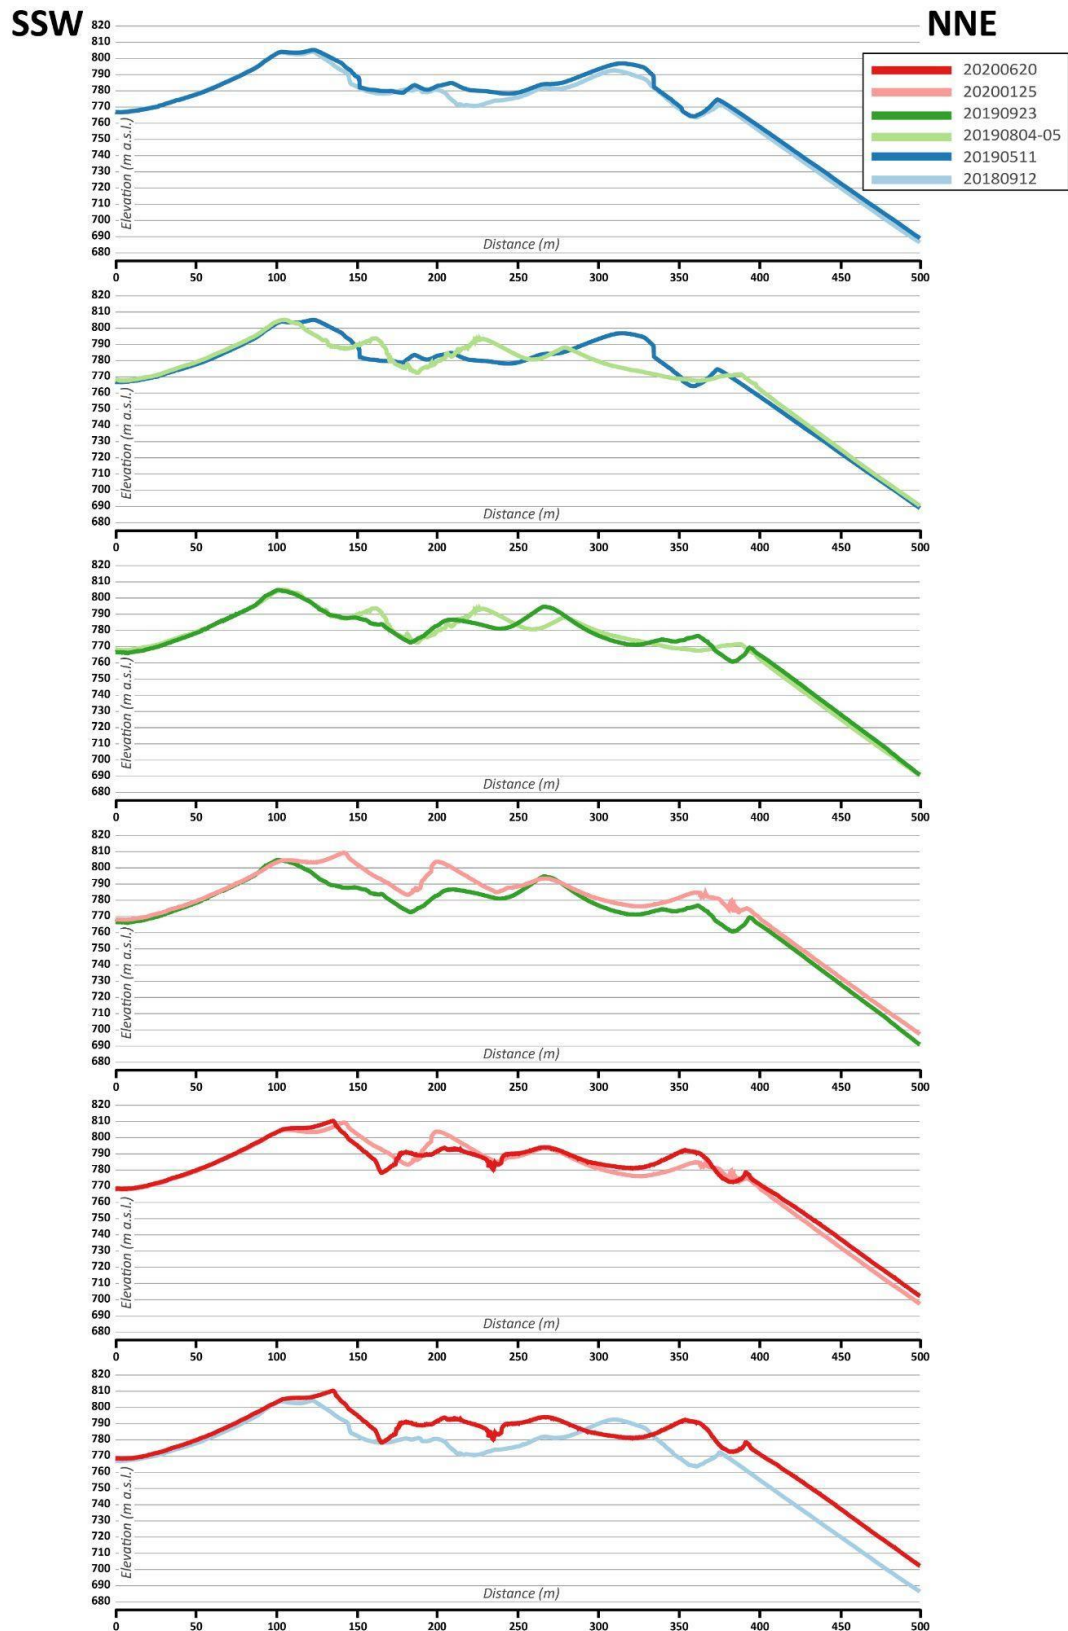

Figure S5 - Cross-sections of the crater terrace through time (12 September 2018 to 20 June 2020) along profile 1 in Figure 5.



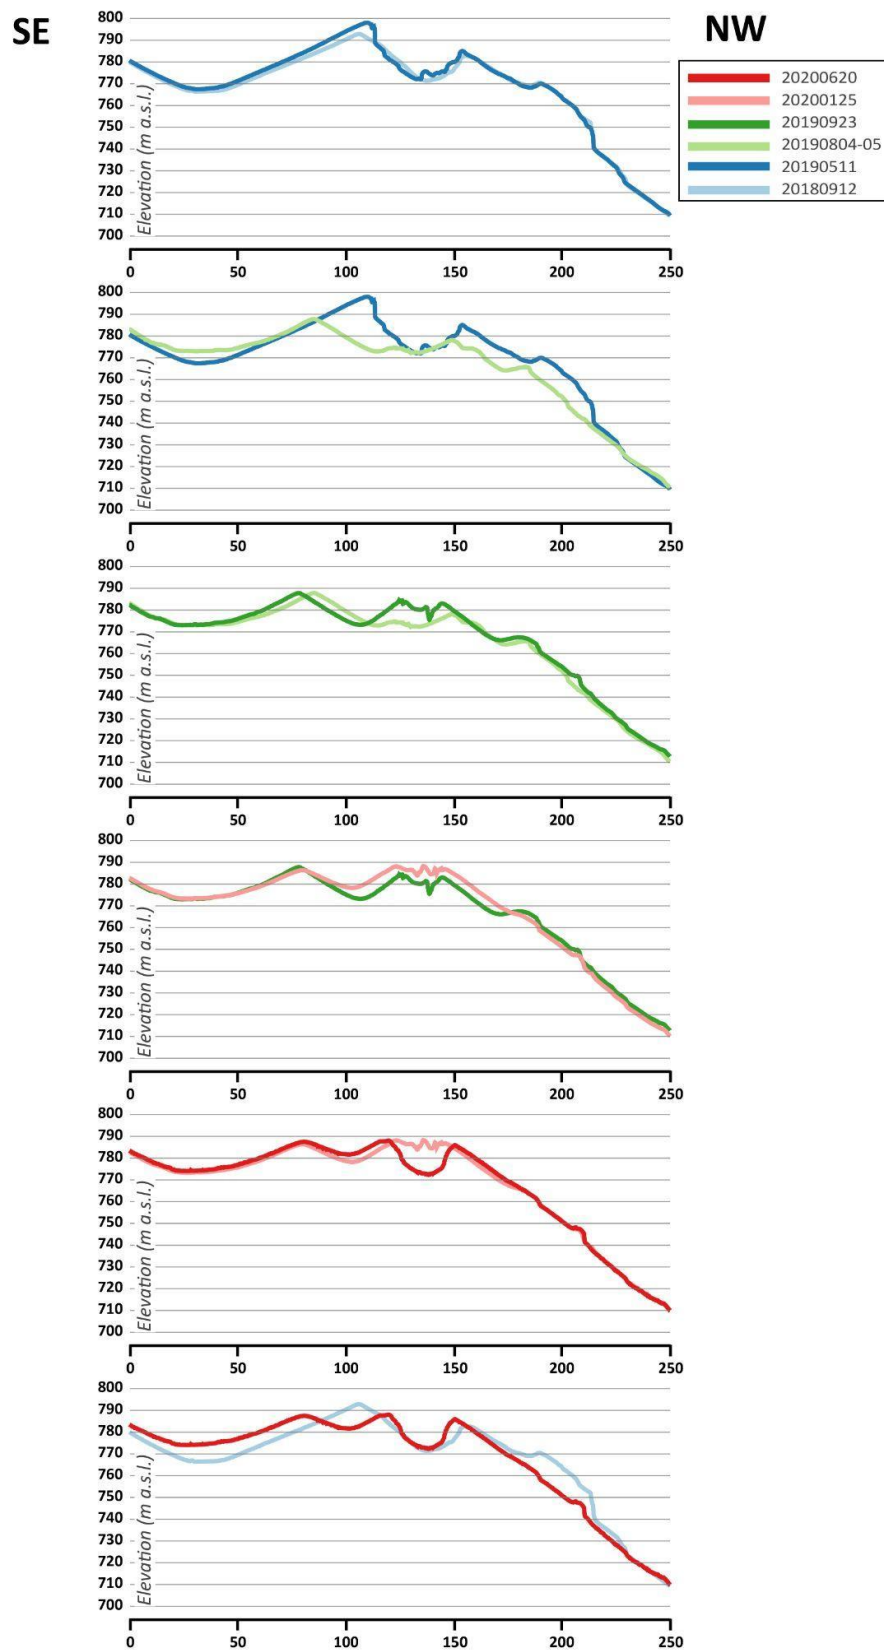

Figure S6 - Cross-sections of the SW crater area and upper SdF through time (12 September 2018 to 20 June 2020) along profile 2 in Figure 5.

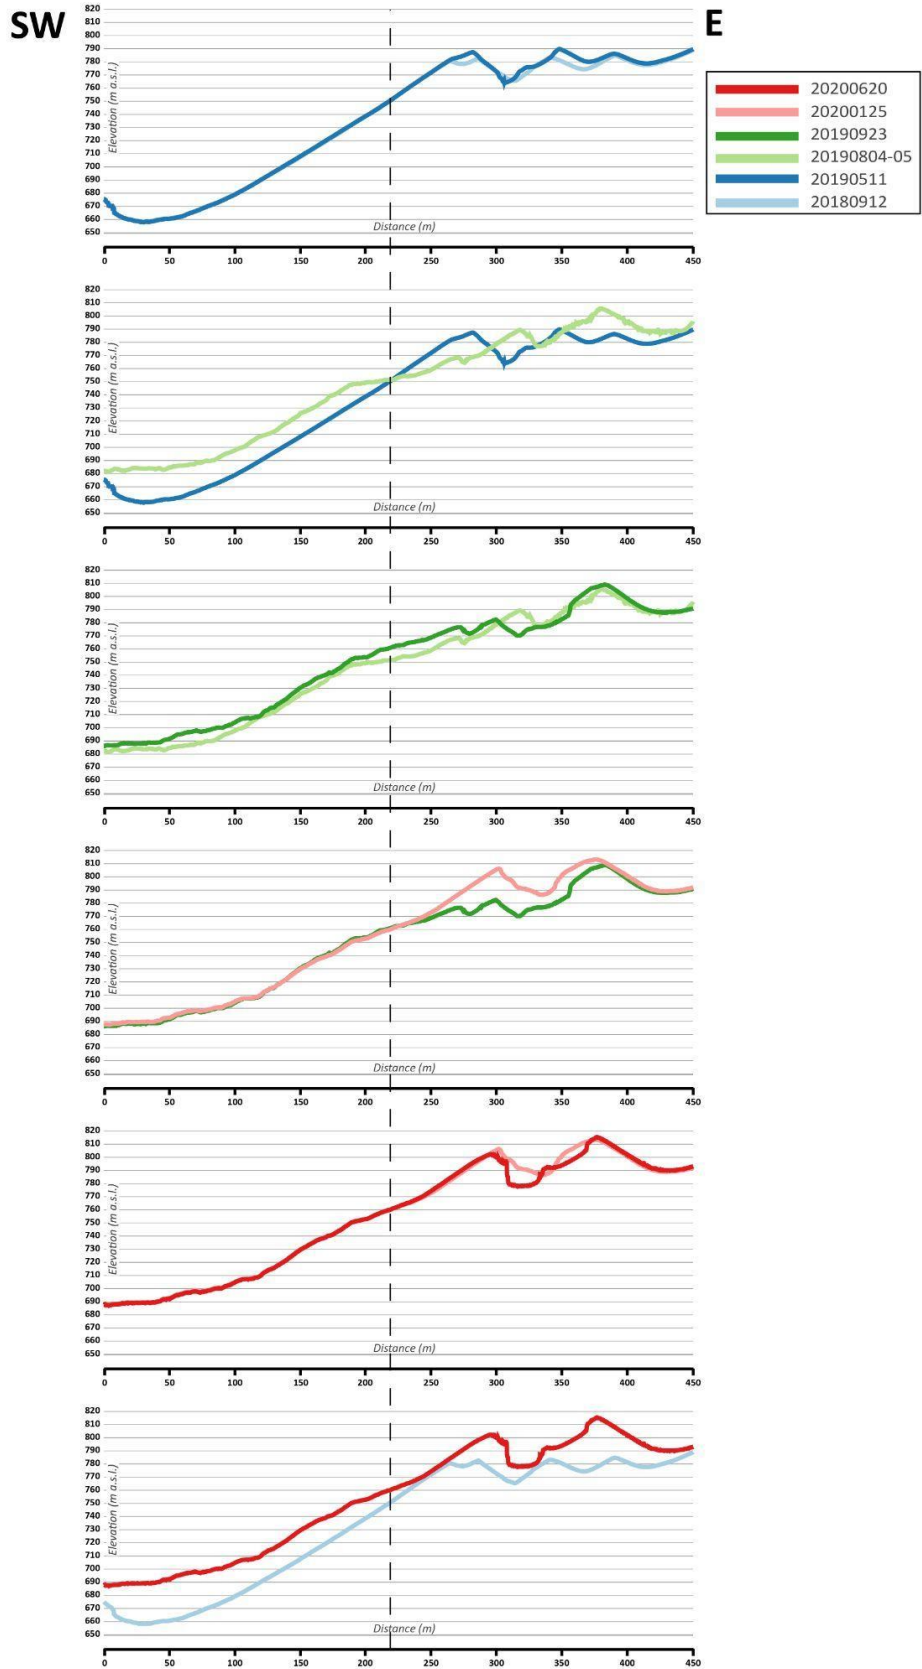

Figure S7 - Cross-sections of the lava field and CS crater area through time (12 September 2018 to 20 June 2020) along profile 3 in Figure 5.



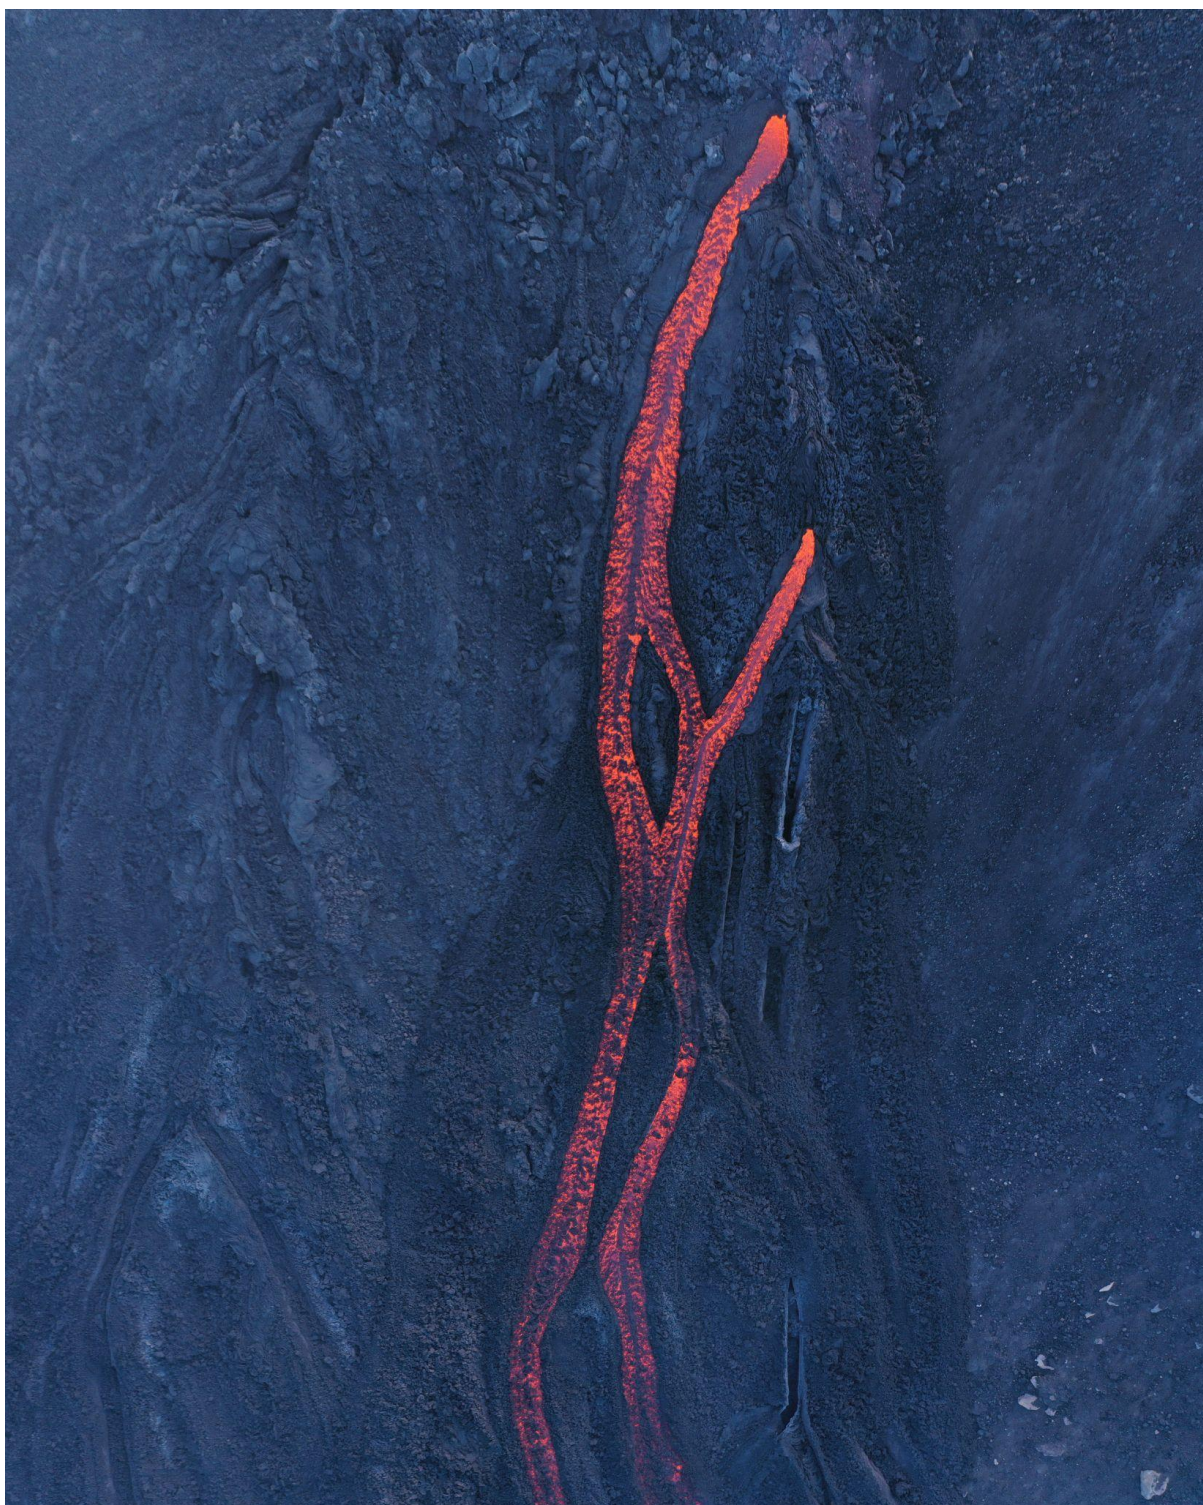

*Figure S8 - Lava field and active lava flows in the upper SdF on 4 August 2019.*



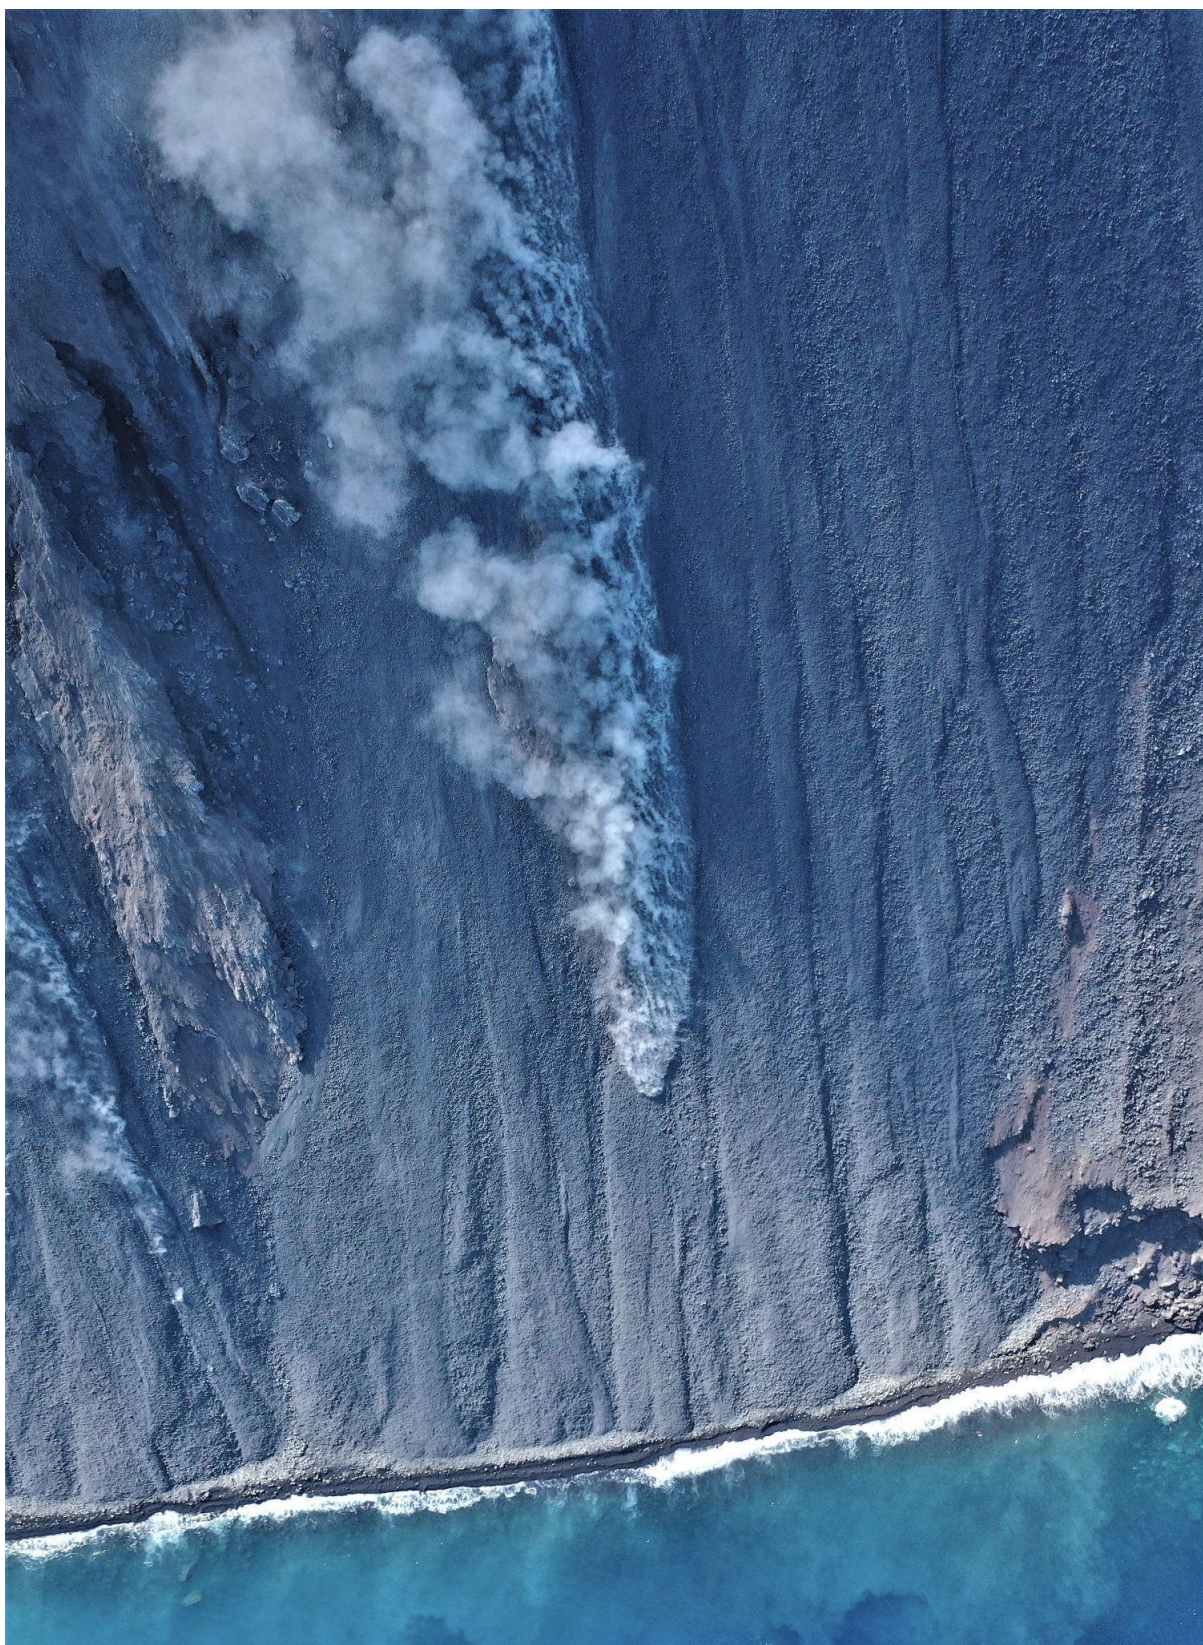

*Figure S9 - Characteristic morphology of gravel flow deposits at the foot of the SdF slope and an active gravel flow descending it (5 August 2019).*



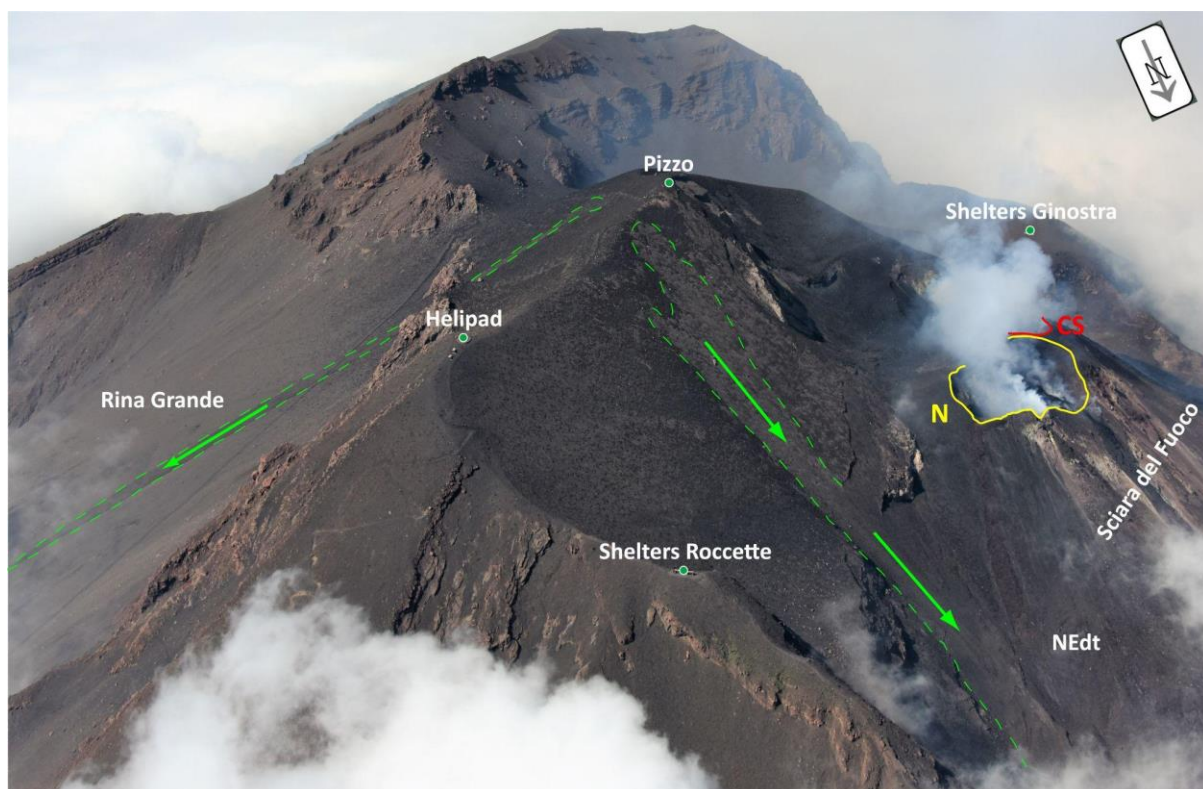

Figure S10 - Gravel flows descending from the Pizzo area within Rina Grande (green arrow on the left) and towards the NEdt sector (green arrows on the right). Photo by S. Branca, INGV-OE, 4 July 2019.
