# Supplementary material for: Unoccupied Aircraft Systems (UASs) Reveal the Morphological Changes at Stromboli Volcano (Italy) before, between, and after the 3 July and 28 August 2019 Paroxysmal Eruptions
Source: MDPI journal article supplement (doi:10.3390/rs13152870), 2021-07-22
Supplement: s1 [file s1]

Archive with 1 entries (1 files):
- remotesensing-1262067-supplementary.pdf
